# Supplementary material for: CD146 Defines a Mesenchymal Stromal Cell Subpopulation with Enhanced Suppressive Properties
Source: MDPI journal article supplement (doi:10.3390/cells11152263), 2022-07-22
Supplement: s1 [file s1]

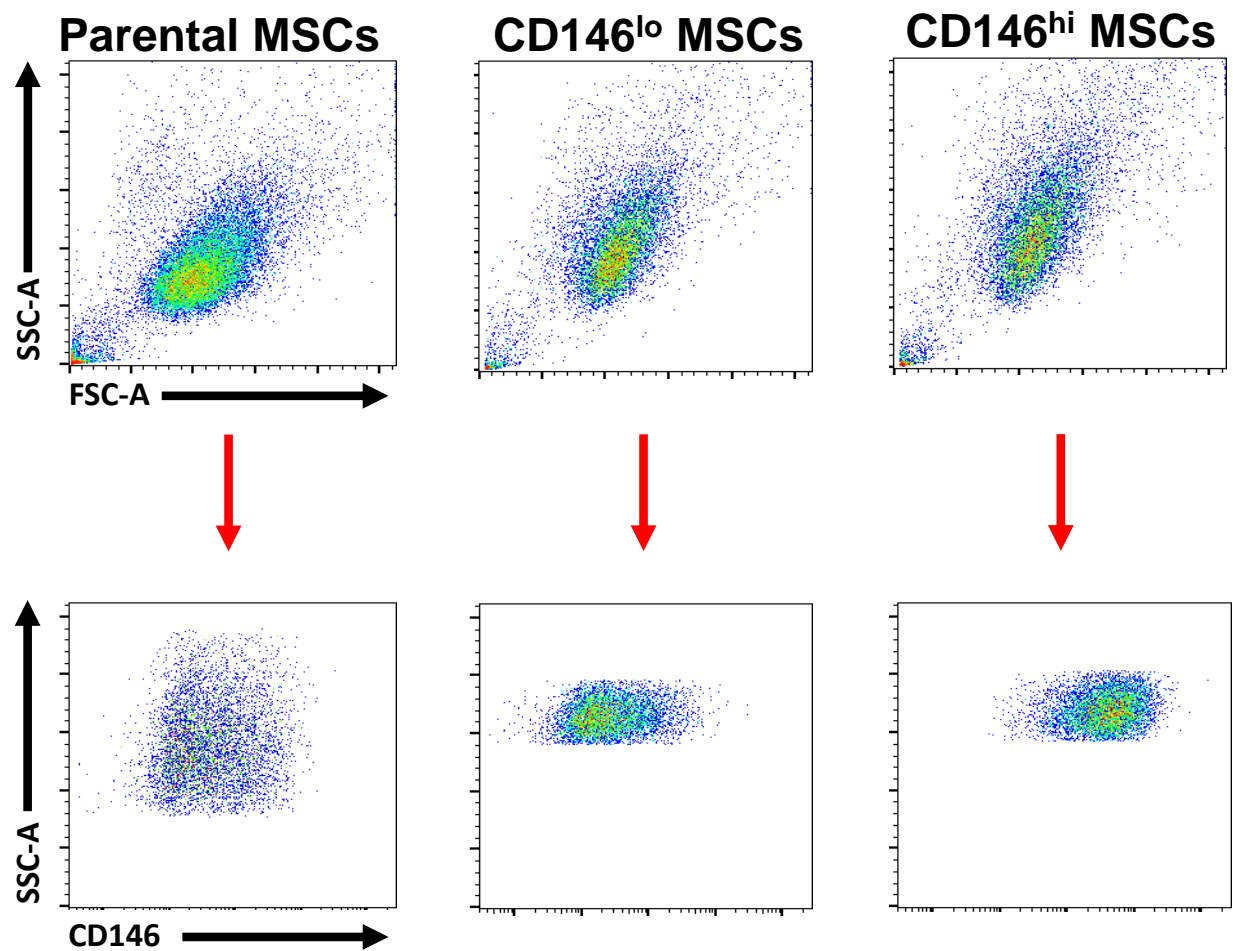

**Supplementary figure S1: Dot blots assessment of sorted MSCs.** As shown in this panel, both CD146<sup>lo</sup> and CD146<sup>hi</sup> MSCs are devoid of any population aggregates.

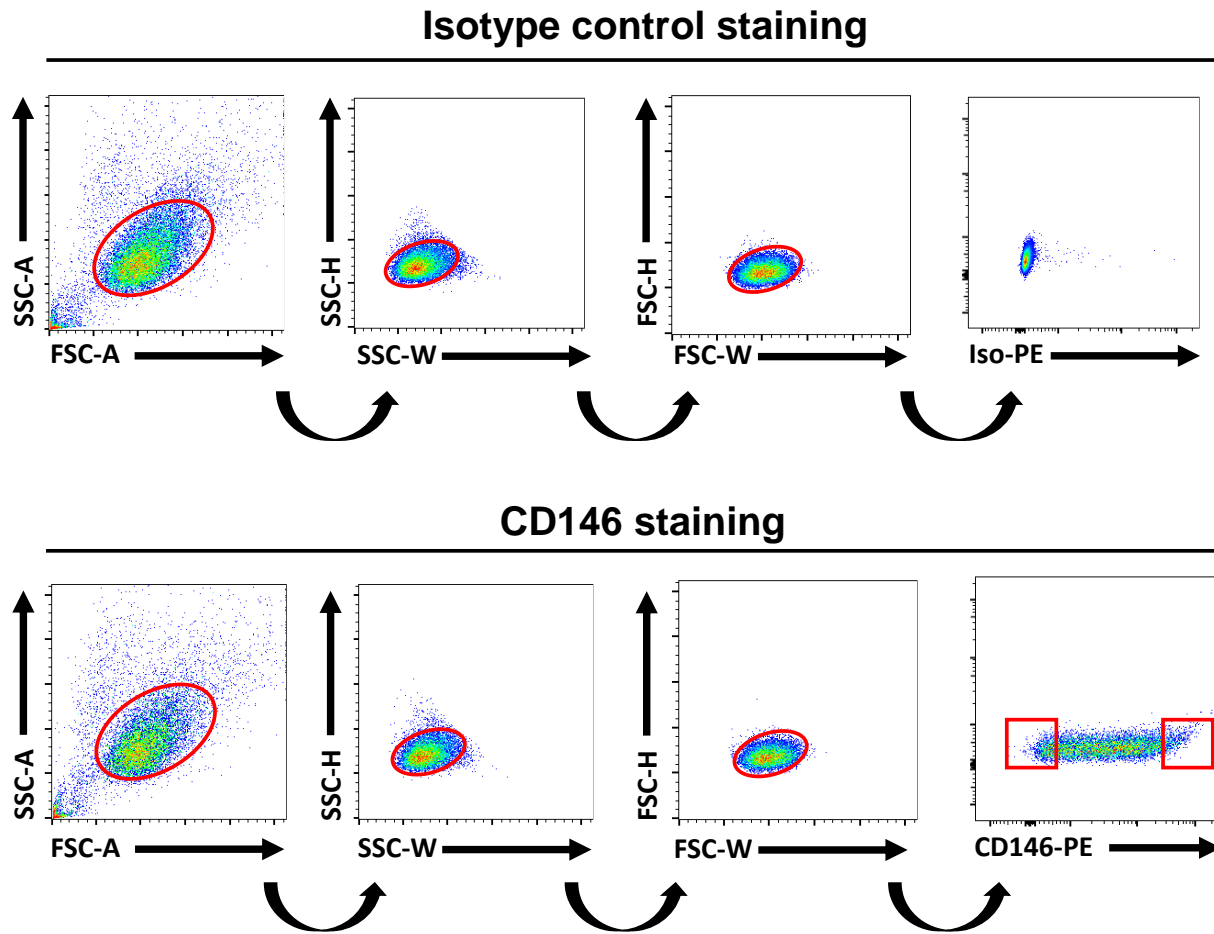

**Supplementary figure S2: Gating strategy used for flow-cytometry analysis and sorting.** The upper panels represent the CD146 isotype staining. The lower panels represent the gating strategy using the CD146 antibody.
